# Supplementary material for: Screening and functional prediction of differentially expressed circular RNAs in human glioma of different grades
Source: Aging (Albany NY). 2020 Dec 11;13(2):1989–2014. doi: 10.18632/aging.202192 (PMC7880344; doi:10.18632/aging.202192)
Supplement: Supplementary Table 2 [file aging-13-202192-s003.xlsx]

## Sheet: Sheet1
Supplementary Table 2. The 129 potential target miRNAs of the 4 identified circRNAs.
No.	miRNA	circbase ID	totalScore	totalEnergy	maxScore	maxEnergy	mreFreq
1	hsa-miR-4656	hsa_circ_0008362	306	-61.27	164	-31.05	2
2	hsa-miR-1298-3p	hsa_circ_0008362	282	-51.1	141	-30.42	2
3	hsa-miR-4254	hsa_circ_0008362	174	-27.54	174	-27.54	1
4	hsa-miR-6837-3p	hsa_circ_0008362	171	-26.78	171	-26.78	1
5	hsa-miR-6813-3p	hsa_circ_0008362	169	-28.16	169	-28.16	1
6	hsa-miR-6768-3p	hsa_circ_0008362	165	-28.49	165	-28.49	1
7	hsa-miR-571	hsa_circ_0008362	162	-26.89	162	-26.89	1
8	hsa-miR-1251-5p	hsa_circ_0008362	162	-24.26	162	-24.26	1
9	hsa-miR-1266-3p	hsa_circ_0008362	161	-21.54	161	-21.54	1
10	hsa-miR-4277	hsa_circ_0008362	161	-25.21	161	-25.21	1
11	hsa-miR-3688-5p	hsa_circ_0008362	161	-20.88	161	-20.88	1
12	hsa-miR-7161-5p	hsa_circ_0008362	159	-24.47	159	-24.47	1
13	hsa-miR-6748-3p	hsa_circ_0008362	157	-27.45	157	-27.45	1
14	hsa-miR-7107-5p	hsa_circ_0008362	157	-31.68	157	-31.68	1
15	hsa-miR-148a-5p	hsa_circ_0008362	156	-24.38	156	-24.38	1
16	hsa-miR-184	hsa_circ_0008362	156	-24.01	156	-24.01	1
17	hsa-miR-4715-5p	hsa_circ_0008362	156	-24.7	156	-24.7	1
18	hsa-miR-4793-3p	hsa_circ_0008362	156	-35.85	156	-35.85	1
19	hsa-miR-324-3p	hsa_circ_0008362	155	-30.04	155	-30.04	1
20	hsa-miR-1913	hsa_circ_0008362	155	-31.67	155	-31.67	1
21	hsa-miR-3130-5p	hsa_circ_0008362	155	-27.55	155	-27.55	1
22	hsa-miR-3183	hsa_circ_0008362	155	-32.41	155	-32.41	1
23	hsa-miR-4308	hsa_circ_0008362	155	-22.49	155	-22.49	1
24	hsa-miR-4804-5p	hsa_circ_0008362	155	-20.65	155	-20.65	1
25	hsa-miR-1234-3p	hsa_circ_0008362	154	-29.6	154	-29.6	1
26	hsa-miR-3620-5p	hsa_circ_0008362	154	-30.98	154	-30.98	1
27	hsa-miR-4436b-5p	hsa_circ_0008362	154	-22.62	154	-22.62	1
28	hsa-miR-5195-3p	hsa_circ_0008362	154	-22.79	154	-22.79	1
29	hsa-miR-660-3p	hsa_circ_0008362	153	-24.89	153	-24.89	1
30	hsa-miR-1248	hsa_circ_0008362	153	-24.49	153	-24.49	1
31	hsa-miR-3929	hsa_circ_0008362	153	-23.1	153	-23.1	1
32	hsa-miR-5196-3p	hsa_circ_0008362	153	-20.47	153	-20.47	1
33	hsa-miR-6826-3p	hsa_circ_0008362	152	-22.77	152	-22.77	1
34	hsa-miR-217-5p	hsa_circ_0008362	151	-25.54	151	-25.54	1
35	hsa-miR-647	hsa_circ_0008362	151	-22.08	151	-22.08	1
36	hsa-miR-4723-3p	hsa_circ_0008362	151	-31.54	151	-31.54	1
37	hsa-miR-6089	hsa_circ_0008362	151	-30.71	151	-30.71	1
38	hsa-miR-6729-3p	hsa_circ_0008362	151	-23.18	151	-23.18	1
39	hsa-miR-30a-3p	hsa_circ_0008362	150	-20.07	150	-20.07	1
40	hsa-miR-204-5p	hsa_circ_0008362	150	-20.28	150	-20.28	1
41	hsa-miR-505-5p	hsa_circ_0008362	150	-20.68	150	-20.68	1
42	hsa-miR-4765	hsa_circ_0008362	150	-20.29	150	-20.29	1
43	hsa-miR-4776-5p	hsa_circ_0008362	150	-23.39	150	-23.39	1
44	hsa-miR-6765-3p	hsa_circ_0000915	294	-49.36	153	-25.2	2
45	hsa-miR-128-1-5p	hsa_circ_0000915	176	-29.47	176	-29.47	1
46	hsa-miR-4685-5p	hsa_circ_0000915	169	-32.12	169	-32.12	1
47	hsa-miR-4757-3p	hsa_circ_0000915	167	-23.89	167	-23.89	1
48	hsa-miR-4778-3p	hsa_circ_0000915	164	-25.36	164	-25.36	1
49	hsa-miR-1226-3p	hsa_circ_0000915	160	-26.59	160	-26.59	1
50	hsa-miR-3151-5p	hsa_circ_0000915	158	-30.67	158	-30.67	1
51	hsa-miR-1976	hsa_circ_0000915	157	-24.25	157	-24.25	1
52	hsa-miR-4758-5p	hsa_circ_0000915	157	-26.27	157	-26.27	1
53	hsa-miR-6815-3p	hsa_circ_0000915	157	-30.9	157	-30.9	1
54	hsa-miR-4519	hsa_circ_0000915	156	-24.11	156	-24.11	1
55	hsa-miR-6740-3p	hsa_circ_0000915	156	-25.15	156	-25.15	1
56	hsa-miR-6827-3p	hsa_circ_0000915	156	-23.82	156	-23.82	1
57	hsa-miR-4292	hsa_circ_0000915	155	-23.83	155	-23.83	1
58	hsa-miR-340-3p	hsa_circ_0000915	154	-21.2	154	-21.2	1
59	hsa-miR-591	hsa_circ_0000915	154	-20.72	154	-20.72	1
60	hsa-miR-330-5p	hsa_circ_0000915	153	-27.5	153	-27.5	1
61	hsa-miR-433-5p	hsa_circ_0000915	153	-21.16	153	-21.16	1
62	hsa-miR-1238-5p	hsa_circ_0000915	153	-20.73	153	-20.73	1
63	hsa-miR-4691-5p	hsa_circ_0000915	153	-30.46	153	-30.46	1
64	hsa-miR-6736-3p	hsa_circ_0000915	153	-24.39	153	-24.39	1
65	hsa-miR-6791-5p	hsa_circ_0000915	153	-24.29	153	-24.29	1
66	hsa-miR-4745-5p	hsa_circ_0000915	152	-24.6	152	-24.6	1
67	hsa-miR-5586-3p	hsa_circ_0000915	152	-20.46	152	-20.46	1
68	hsa-miR-6837-5p	hsa_circ_0000915	152	-23.21	152	-23.21	1
69	hsa-miR-7703	hsa_circ_0000915	152	-31.04	152	-31.04	1
70	hsa-miR-128-2-5p	hsa_circ_0000915	151	-24.75	151	-24.75	1
71	hsa-miR-1291	hsa_circ_0000915	150	-29.67	150	-29.67	1
72	hsa-miR-4298	hsa_circ_0000915	150	-23.27	150	-23.27	1
73	hsa-miR-4268	hsa_circ_0000915	150	-28.44	150	-28.44	1
74	hsa-miR-5702	hsa_circ_0000915	150	-20.52	150	-20.52	1
75	hsa-miR-6770-3p	hsa_circ_0000915	150	-26.97	150	-26.97	1
76	hsa-miR-6827-5p	hsa_circ_0001467	307	-44.03	164	-22.47	2
77	hsa-miR-6794-3p	hsa_circ_0001467	164	-21.31	164	-21.31	1
78	hsa-miR-4715-3p	hsa_circ_0001467	163	-28.49	163	-28.49	1
79	hsa-miR-6750-5p	hsa_circ_0001467	162	-28.35	162	-28.35	1
80	hsa-miR-766-3p	hsa_circ_0001467	161	-28.56	161	-28.56	1
81	hsa-miR-640	hsa_circ_0001467	160	-20.81	160	-20.81	1
82	hsa-miR-3126-5p	hsa_circ_0001467	159	-29.03	159	-29.03	1
83	hsa-miR-6884-3p	hsa_circ_0001467	159	-22.1	159	-22.1	1
84	hsa-miR-6822-5p	hsa_circ_0001467	157	-25.04	157	-25.04	1
85	hsa-miR-508-5p	hsa_circ_0001467	156	-21.71	156	-21.71	1
86	hsa-miR-758-5p	hsa_circ_0001467	155	-20.17	155	-20.17	1
87	hsa-miR-4723-5p	hsa_circ_0001467	155	-27.28	155	-27.28	1
88	hsa-miR-302d-5p	hsa_circ_0001467	154	-20.54	154	-20.54	1
89	hsa-miR-4428	hsa_circ_0001467	154	-20.56	154	-20.56	1
90	hsa-miR-670-5p	hsa_circ_0001467	152	-24.27	152	-24.27	1
91	hsa-miR-938	hsa_circ_0001467	152	-21.15	152	-21.15	1
92	hsa-miR-6720-5p	hsa_circ_0001467	152	-30.47	152	-30.47	1
93	hsa-miR-510-5p	hsa_circ_0001467	151	-22.06	151	-22.06	1
94	hsa-miR-4649-3p	hsa_circ_0001467	151	-23.53	151	-23.53	1
95	hsa-miR-5088-5p	hsa_circ_0001467	151	-24.3	151	-24.3	1
96	hsa-miR-6872-3p	hsa_circ_0001467	151	-24.68	151	-24.68	1
97	hsa-miR-6891-5p	hsa_circ_0001467	151	-20.99	151	-20.99	1
98	hsa-miR-922	hsa_circ_0001467	150	-23.55	150	-23.55	1
99	hsa-miR-4470	hsa_circ_0001467	150	-21.27	150	-21.27	1
100	hsa-miR-6847-3p	hsa_circ_0001467	150	-21.6	150	-21.6	1
101	hsa-miR-3945	hsa_circ_0127664	177	-32.04	177	-32.04	1
102	hsa-miR-302b-3p	hsa_circ_0127664	175	-23.43	175	-23.43	1
103	hsa-miR-302c-3p	hsa_circ_0127664	175	-27.14	175	-27.14	1
104	hsa-miR-302a-3p	hsa_circ_0127664	171	-22.07	171	-22.07	1
105	hsa-miR-520c-3p	hsa_circ_0127664	171	-27.39	171	-27.39	1
106	hsa-miR-302d-3p	hsa_circ_0127664	169	-21.69	169	-21.69	1
107	hsa-miR-6770-5p	hsa_circ_0127664	168	-24.5	168	-24.5	1
108	hsa-miR-520b	hsa_circ_0127664	166	-27.12	166	-27.12	1
109	hsa-miR-3612	hsa_circ_0127664	166	-23.34	166	-23.34	1
110	hsa-miR-6775-5p	hsa_circ_0127664	166	-43.7	166	-43.7	1
111	hsa-miR-6828-3p	hsa_circ_0127664	166	-25.19	166	-25.19	1
112	hsa-miR-455-3p	hsa_circ_0127664	165	-23.58	165	-23.58	1
113	hsa-miR-373-3p	hsa_circ_0127664	163	-22.62	163	-22.62	1
114	hsa-miR-302e	hsa_circ_0127664	163	-21.46	163	-21.46	1
115	hsa-miR-921	hsa_circ_0127664	161	-21.4	161	-21.4	1
116	hsa-miR-520e	hsa_circ_0127664	158	-22.25	158	-22.25	1
117	hsa-miR-5689	hsa_circ_0127664	156	-24.44	156	-24.44	1
118	hsa-miR-520f-3p	hsa_circ_0127664	155	-27.84	155	-27.84	1
119	hsa-miR-6728-5p	hsa_circ_0127664	155	-22.49	155	-22.49	1
120	hsa-miR-6806-3p	hsa_circ_0127664	155	-20.62	155	-20.62	1
121	hsa-miR-3917	hsa_circ_0127664	154	-26.11	154	-26.11	1
122	hsa-miR-4516	hsa_circ_0127664	154	-27.53	154	-27.53	1
123	hsa-miR-4695-5p	hsa_circ_0127664	154	-20.72	154	-20.72	1
124	hsa-miR-6824-5p	hsa_circ_0127664	152	-30.04	152	-30.04	1
125	hsa-miR-6831-5p	hsa_circ_0127664	152	-20.73	152	-20.73	1
126	hsa-miR-99b-3p	hsa_circ_0127664	151	-25.57	151	-25.57	1
127	hsa-miR-526b-3p	hsa_circ_0127664	151	-26.71	151	-26.71	1
128	hsa-miR-99a-3p	hsa_circ_0127664	150	-23.56	150	-23.56	1
129	hsa-miR-8057	hsa_circ_0127664	150	-23.63	150	-23.63	1
