# Supplementary material for: Screening and functional prediction of differentially expressed circular RNAs in human glioma of different grades
Source: Aging (Albany NY). 2020 Dec 11;13(2):1989–2014. doi: 10.18632/aging.202192 (PMC7880344; doi:10.18632/aging.202192)
Supplement: Supplementary Table 3 [file aging-13-202192-s004.xlsx]

## Sheet: Sheet1
Supplementary Table 3. Information on the circRNA-miRNA-mRNA network.
miRNA	target
hsa-miR-6765-3p	hsa_circ_0000915
hsa-miR-128-1-5p	hsa_circ_0000915
hsa-miR-4685-5p	hsa_circ_0000915
hsa-miR-4757-3p	hsa_circ_0000915
hsa-miR-4778-3p	hsa_circ_0000915
hsa-miR-1226-3p	hsa_circ_0000915
hsa-miR-3151-5p	hsa_circ_0000915
hsa-miR-1976	hsa_circ_0000915
hsa-miR-4758-5p	hsa_circ_0000915
hsa-miR-6815-3p	hsa_circ_0000915
hsa-miR-4519	hsa_circ_0000915
hsa-miR-6740-3p	hsa_circ_0000915
hsa-miR-6827-3p	hsa_circ_0000915
hsa-miR-4292	hsa_circ_0000915
hsa-miR-340-3p	hsa_circ_0000915
hsa-miR-591	hsa_circ_0000915
hsa-miR-330-5p	hsa_circ_0000915
hsa-miR-433-5p	hsa_circ_0000915
hsa-miR-1238-5p	hsa_circ_0000915
hsa-miR-4691-5p	hsa_circ_0000915
hsa-miR-6736-3p	hsa_circ_0000915
hsa-miR-6791-5p	hsa_circ_0000915
hsa-miR-4745-5p	hsa_circ_0000915
hsa-miR-5586-3p	hsa_circ_0000915
hsa-miR-6837-5p	hsa_circ_0000915
hsa-miR-7703	hsa_circ_0000915
hsa-miR-128-2-5p	hsa_circ_0000915
hsa-miR-1291	hsa_circ_0000915
hsa-miR-4298	hsa_circ_0000915
hsa-miR-4268	hsa_circ_0000915
hsa-miR-5702	hsa_circ_0000915
hsa-miR-6770-3p	hsa_circ_0000915
hsa-miR-330-5p	ZNF394
hsa-miR-330-5p	HSD11B1
hsa-miR-330-5p	DNAH10OS
hsa-miR-330-5p	KCNC1
hsa-miR-330-5p	PPP1R3F
hsa-miR-330-5p	DNAJB12
hsa-miR-330-5p	ZNF322
hsa-miR-330-5p	TNFSF14
hsa-miR-330-5p	CTNS
hsa-miR-330-5p	PALM
hsa-miR-330-5p	IFRG15
hsa-miR-330-5p	C16orf45
hsa-miR-330-5p	EMILIN3
hsa-miR-330-5p	TNFSF15
hsa-miR-330-5p	SYT9
hsa-miR-330-5p	ARPC5L
hsa-miR-330-5p	CNN1
hsa-miR-330-5p	NKIRAS2
hsa-miR-330-5p	NSL1
hsa-miR-330-5p	FAM127B
hsa-miR-330-5p	LRRC20
hsa-miR-330-5p	LARP1
hsa-miR-330-5p	FGF11
hsa-miR-330-5p	CTC-349C3.1
hsa-miR-330-5p	SNRPA
hsa-miR-330-5p	PPP3CB
hsa-miR-330-5p	WDR91
hsa-miR-330-5p	TLN1
hsa-miR-330-5p	OXSR1
hsa-miR-330-5p	FAM221B
hsa-miR-330-5p	NKX2-8
hsa-miR-330-5p	SLC5A3
hsa-miR-330-5p	EML2
hsa-miR-330-5p	LASP1
hsa-miR-330-5p	PIP4K2C
hsa-miR-330-5p	ERBB2IP
hsa-miR-330-5p	SLC23A2
hsa-miR-330-5p	EBPL
hsa-miR-330-5p	CNBP
hsa-miR-330-5p	DGKG
hsa-miR-330-5p	IQSEC3
hsa-miR-330-5p	SMTNL2
hsa-miR-330-5p	MYO1C
hsa-miR-330-5p	PHB2
hsa-miR-330-5p	SLC7A2
hsa-miR-330-5p	EHMT2
hsa-miR-330-5p	FAIM2
hsa-miR-330-5p	DYNLL1
hsa-miR-330-5p	APBA1
hsa-miR-330-5p	KIAA1328
hsa-miR-330-5p	METAP1
hsa-miR-330-5p	FRAS1
hsa-miR-330-5p	C15orf32
hsa-miR-330-5p	NCAN
hsa-miR-330-5p	MEX3C
hsa-miR-330-5p	EIF1
hsa-miR-330-5p	TCEANC2
hsa-miR-330-5p	SLC19A2
hsa-miR-3945	hsa_circ_0127664
hsa-miR-302b-3p	hsa_circ_0127664
hsa-miR-302c-3p	hsa_circ_0127664
hsa-miR-302a-3p	hsa_circ_0127664
hsa-miR-520c-3p	hsa_circ_0127664
hsa-miR-302d-3p	hsa_circ_0127664
hsa-miR-6770-5p	hsa_circ_0127664
hsa-miR-520b	hsa_circ_0127664
hsa-miR-3612	hsa_circ_0127664
hsa-miR-6775-5p	hsa_circ_0127664
hsa-miR-6828-3p	hsa_circ_0127664
hsa-miR-455-3p	hsa_circ_0127664
hsa-miR-373-3p	hsa_circ_0127664
hsa-miR-302e	hsa_circ_0127664
hsa-miR-921	hsa_circ_0127664
hsa-miR-520e	hsa_circ_0127664
hsa-miR-5689	hsa_circ_0127664
hsa-miR-520f-3p	hsa_circ_0127664
hsa-miR-6728-5p	hsa_circ_0127664
hsa-miR-6806-3p	hsa_circ_0127664
hsa-miR-3917	hsa_circ_0127664
hsa-miR-4516	hsa_circ_0127664
hsa-miR-4695-5p	hsa_circ_0127664
hsa-miR-6824-5p	hsa_circ_0127664
hsa-miR-6831-5p	hsa_circ_0127664
hsa-miR-99b-3p	hsa_circ_0127664
hsa-miR-526b-3p	hsa_circ_0127664
hsa-miR-99a-3p	hsa_circ_0127664
hsa-miR-8057	hsa_circ_0127664
hsa-miR-99b-3p	RECQL
hsa-miR-99b-3p	LINC00999
hsa-miR-99b-3p	SCP2
hsa-miR-99b-3p	CREM
hsa-miR-99b-3p	SOCS4
hsa-miR-99b-3p	SPRR2A
hsa-miR-99b-3p	RAB7L1
hsa-miR-99b-3p	RANBP6
hsa-miR-99b-3p	SLBP
hsa-miR-99b-3p	TMEM14C
hsa-miR-99b-3p	PRIMA1
hsa-miR-99b-3p	EDN3
hsa-miR-99b-3p	ANKRD13C
hsa-miR-99b-3p	DLGAP2
hsa-miR-99b-3p	AGFG2
hsa-miR-99b-3p	MMP8
hsa-miR-99b-3p	ARL15
hsa-miR-99b-3p	OR6X1
hsa-miR-99b-3p	AES
hsa-miR-99b-3p	POC1B-GALNT4
hsa-miR-99b-3p	MTFR2
hsa-miR-99b-3p	R3HCC1
hsa-miR-99b-3p	AC002472.13
hsa-miR-99b-3p	CLHC1
hsa-miR-99b-3p	AIPL1
hsa-miR-99b-3p	GK5
hsa-miR-99b-3p	ZNF225
hsa-miR-99b-3p	ZNF664
hsa-miR-99b-3p	PTPMT1
hsa-miR-99b-3p	PYGL
hsa-miR-99b-3p	HLF
hsa-miR-99b-3p	FXYD7
hsa-miR-99b-3p	NAA10
hsa-miR-99b-3p	GATA2
hsa-miR-99b-3p	PRTFDC1
hsa-miR-99b-3p	NXT2
hsa-miR-99b-3p	SKA2
hsa-miR-99b-3p	PPCS
hsa-miR-99b-3p	GIMAP1
hsa-miR-99b-3p	HS3ST2
hsa-miR-99b-3p	GPR83
hsa-miR-99b-3p	CCL5
hsa-miR-99b-3p	TTC32
hsa-miR-99b-3p	PET117
hsa-miR-99b-3p	CLCC1
hsa-miR-99b-3p	HOXD3
hsa-miR-99b-3p	DIO2
hsa-miR-99b-3p	SERTAD4
hsa-miR-99b-3p	FAM129A
hsa-miR-99b-3p	WFDC5
hsa-miR-99b-3p	DEDD
hsa-miR-99b-3p	PPP1R3G
hsa-miR-99b-3p	SLCO4C1
hsa-miR-99b-3p	ATP2B2
hsa-miR-99b-3p	PTGFR
hsa-miR-99b-3p	JPH3
hsa-miR-99b-3p	TTC23
hsa-miR-99b-3p	MGARP
hsa-miR-99b-3p	CHRM2
hsa-miR-99b-3p	GGT7
hsa-miR-4656	hsa_circ_0008362
hsa-miR-1298-3p	hsa_circ_0008362
hsa-miR-4254	hsa_circ_0008362
hsa-miR-6837-3p	hsa_circ_0008362
hsa-miR-6813-3p	hsa_circ_0008362
hsa-miR-6768-3p	hsa_circ_0008362
hsa-miR-571	hsa_circ_0008362
hsa-miR-1251-5p	hsa_circ_0008362
hsa-miR-1266-3p	hsa_circ_0008362
hsa-miR-4277	hsa_circ_0008362
hsa-miR-3688-5p	hsa_circ_0008362
hsa-miR-7161-5p	hsa_circ_0008362
hsa-miR-6748-3p	hsa_circ_0008362
hsa-miR-7107-5p	hsa_circ_0008362
hsa-miR-148a-5p	hsa_circ_0008362
hsa-miR-184	hsa_circ_0008362
hsa-miR-4715-5p	hsa_circ_0008362
hsa-miR-4793-3p	hsa_circ_0008362
hsa-miR-324-3p	hsa_circ_0008362
hsa-miR-1913	hsa_circ_0008362
hsa-miR-3130-5p	hsa_circ_0008362
hsa-miR-3183	hsa_circ_0008362
hsa-miR-4308	hsa_circ_0008362
hsa-miR-4804-5p	hsa_circ_0008362
hsa-miR-1234-3p	hsa_circ_0008362
hsa-miR-3620-5p	hsa_circ_0008362
hsa-miR-4436b-5p	hsa_circ_0008362
hsa-miR-5195-3p	hsa_circ_0008362
hsa-miR-660-3p	hsa_circ_0008362
hsa-miR-1248	hsa_circ_0008362
hsa-miR-3929	hsa_circ_0008362
hsa-miR-5196-3p	hsa_circ_0008362
hsa-miR-6826-3p	hsa_circ_0008362
hsa-miR-217-5p	hsa_circ_0008362
hsa-miR-647	hsa_circ_0008362
hsa-miR-4723-3p	hsa_circ_0008362
hsa-miR-6089	hsa_circ_0008362
hsa-miR-6729-3p	hsa_circ_0008362
hsa-miR-30a-3p	hsa_circ_0008362
hsa-miR-204-5p	hsa_circ_0008362
hsa-miR-505-5p	hsa_circ_0008362
hsa-miR-4765	hsa_circ_0008362
hsa-miR-4776-5p	hsa_circ_0008362
hsa-miR-217-5p	ANLN
hsa-miR-217-5p	DACH1
hsa-miR-217-5p	ATP1B1
hsa-miR-217-5p	FRMD5
hsa-miR-217-5p	SLC38A2
hsa-miR-217-5p	BCL11A
hsa-miR-217-5p	ATP11C
hsa-miR-217-5p	MIER3
hsa-miR-217-5p	ZCCHC2
hsa-miR-217-5p	SH3PXD2A
hsa-miR-217-5p	KDELC1
hsa-miR-217-5p	SPOPL
hsa-miR-217-5p	APPBP2
hsa-miR-217-5p	COX18
hsa-miR-217-5p	YTHDC1
hsa-miR-217-5p	GPM6A
hsa-miR-217-5p	PPM1A
hsa-miR-217-5p	ATP8A1
hsa-miR-217-5p	C5orf24
hsa-miR-217-5p	EZH2
hsa-miR-217-5p	CHN2
hsa-miR-217-5p	TXNDC16
hsa-miR-217-5p	RIMS2
hsa-miR-217-5p	RHOT1
hsa-miR-217-5p	CDYL2
hsa-miR-217-5p	ALDH16A1
hsa-miR-217-5p	DOCK3
hsa-miR-217-5p	ICK
hsa-miR-217-5p	DACT1
hsa-miR-217-5p	POLD3
hsa-miR-217-5p	PPP4R2
hsa-miR-217-5p	HNF1B
hsa-miR-217-5p	RAPGEF6
hsa-miR-217-5p	STT3A
hsa-miR-217-5p	RTF1
hsa-miR-217-5p	TMTC4
hsa-miR-217-5p	TTC28
hsa-miR-217-5p	MAST4
hsa-miR-217-5p	ZNF92
hsa-miR-217-5p	GBE1
hsa-miR-217-5p	RAB4A
hsa-miR-217-5p	PPM1D
hsa-miR-217-5p	SCAMP1
hsa-miR-217-5p	TUBB6
hsa-miR-217-5p	KATNA1
hsa-miR-217-5p	WAPL
hsa-miR-217-5p	KRAS
hsa-miR-217-5p	FOXL2NB
hsa-miR-217-5p	ACER3
hsa-miR-217-5p	ZNF680
hsa-miR-217-5p	USP27X
hsa-miR-217-5p	AAK1
hsa-miR-217-5p	GXYLT1
hsa-miR-217-5p	MTERF3
hsa-miR-217-5p	FBN2
hsa-miR-217-5p	SCN9A
hsa-miR-217-5p	PSIP1
hsa-miR-217-5p	CA8
hsa-miR-217-5p	PDE12
hsa-miR-217-5p	MYEF2
hsa-miR-217-5p	FGFR2
hsa-miR-217-5p	HIPK3
hsa-miR-217-5p	ASXL3
hsa-miR-217-5p	PTPN21
hsa-miR-217-5p	VSNL1
hsa-miR-217-5p	MGAT4A
hsa-miR-217-5p	ADGRB3
hsa-miR-217-5p	NAB1
hsa-miR-217-5p	SEMA3A
hsa-miR-217-5p	LPAR1
hsa-miR-217-5p	YOD1
hsa-miR-217-5p	DDX53
hsa-miR-217-5p	ATF1
hsa-miR-217-5p	HSPA9
hsa-miR-217-5p	HIVEP3
hsa-miR-217-5p	CTNNB1
hsa-miR-217-5p	ZBTB24
hsa-miR-217-5p	ITPA
hsa-miR-217-5p	UBL3
hsa-miR-217-5p	NFAT5
hsa-miR-217-5p	HS3ST3A1
hsa-miR-217-5p	NSUN3
hsa-miR-217-5p	MRE11
hsa-miR-6827-5p	hsa_circ_0001467
hsa-miR-6794-3p	hsa_circ_0001467
hsa-miR-4715-3p	hsa_circ_0001467
hsa-miR-6750-5p	hsa_circ_0001467
hsa-miR-766-3p	hsa_circ_0001467
hsa-miR-640	hsa_circ_0001467
hsa-miR-3126-5p	hsa_circ_0001467
hsa-miR-6884-3p	hsa_circ_0001467
hsa-miR-6822-5p	hsa_circ_0001467
hsa-miR-508-5p	hsa_circ_0001467
hsa-miR-758-5p	hsa_circ_0001467
hsa-miR-4723-5p	hsa_circ_0001467
hsa-miR-302d-5p	hsa_circ_0001467
hsa-miR-4428	hsa_circ_0001467
hsa-miR-670-5p	hsa_circ_0001467
hsa-miR-938	hsa_circ_0001467
hsa-miR-6720-5p	hsa_circ_0001467
hsa-miR-510-5p	hsa_circ_0001467
hsa-miR-4649-3p	hsa_circ_0001467
hsa-miR-5088-5p	hsa_circ_0001467
hsa-miR-6872-3p	hsa_circ_0001467
hsa-miR-6891-5p	hsa_circ_0001467
hsa-miR-922	hsa_circ_0001467
hsa-miR-4470	hsa_circ_0001467
hsa-miR-6847-3p	hsa_circ_0001467
hsa-miR-302d-5p	HLA-A
hsa-miR-302d-5p	IGSF3
hsa-miR-302d-5p	COL4A3BP
hsa-miR-302d-5p	RALYL
hsa-miR-302d-5p	NRBP2
hsa-miR-302d-5p	EIF5B
hsa-miR-302d-5p	ZDBF2
hsa-miR-302d-5p	CLDN12
hsa-miR-302d-5p	PSMC6
hsa-miR-302d-5p	AP002884.2
hsa-miR-302d-5p	TTN
hsa-miR-302d-5p	HSCB
hsa-miR-302d-5p	PRPF4B
hsa-miR-302d-5p	SAMM50
hsa-miR-302d-5p	C9orf38
hsa-miR-302d-5p	ANKRD30B
hsa-miR-302d-5p	AIG1
hsa-miR-302d-5p	MRPL15
hsa-miR-302d-5p	CCDC39
hsa-miR-302d-5p	EIF1AY
hsa-miR-302d-5p	ATG4C
hsa-miR-302d-5p	FCER1G
hsa-miR-302d-5p	RAB9B
hsa-miR-302d-5p	MCEE
hsa-miR-302d-5p	AAMP
hsa-miR-302d-5p	CDCA7L
hsa-miR-302d-5p	COQ2
hsa-miR-302d-5p	TMF1
hsa-miR-302d-5p	UPF3A
hsa-miR-302d-5p	DAZAP1
hsa-miR-302d-5p	RP11-386G21.1
hsa-miR-302d-5p	NEBL
hsa-miR-302d-5p	PPCS
hsa-miR-302d-5p	ATOH1
hsa-miR-302d-5p	SP5
hsa-miR-302d-5p	FAM122C
hsa-miR-302d-5p	ZNF670
hsa-miR-302d-5p	C4orf6
hsa-miR-302d-5p	FAM178A
hsa-miR-302d-5p	OCLM
hsa-miR-302d-5p	CXorf40B
hsa-miR-302d-5p	SPATA4
hsa-miR-302d-5p	MBD2
hsa-miR-302d-5p	AC092675.3
hsa-miR-302d-5p	TM2D1
hsa-miR-302d-5p	TEX12
hsa-miR-302d-5p	USP27X
hsa-miR-302d-5p	ACSM5
hsa-miR-302d-5p	DDX53
hsa-miR-302d-5p	LZTFL1
hsa-miR-302d-5p	TPM1
hsa-miR-302d-5p	MSANTD3-TMEFF1
hsa-miR-302d-5p	FAM174A
hsa-miR-302d-5p	GSDMC
hsa-miR-302d-5p	ETFA
hsa-miR-302d-5p	PPIF
hsa-miR-302d-5p	DBF4
hsa-miR-302d-5p	SHCBP1L
hsa-miR-302d-5p	KANSL2
hsa-miR-302d-5p	TMEFF1
hsa-miR-302d-5p	LRR1
hsa-miR-302d-5p	CTXN3
hsa-miR-302d-5p	RP11-595B24.2
hsa-miR-302d-5p	ME2
hsa-miR-302d-5p	RP11-219B4.6
hsa-miR-302d-5p	KIAA1279
hsa-miR-302d-5p	HECTD2
hsa-miR-302d-5p	MRPL50
hsa-miR-302d-5p	UTS2B
hsa-miR-302d-5p	CNBP
hsa-miR-302d-5p	LEPROT
hsa-miR-302d-5p	C5orf51
hsa-miR-302d-5p	LIN7B
hsa-miR-302d-5p	MYL4
hsa-miR-302d-5p	FAM46D
hsa-miR-302d-5p	GULP1
hsa-miR-302d-5p	C9orf40
hsa-miR-302d-5p	GADD45A
hsa-miR-302d-5p	CMPK1
hsa-miR-302d-5p	MAGEE2
hsa-miR-302d-5p	LATS2
hsa-miR-302d-5p	KTN1
hsa-miR-302d-5p	PPHLN1
hsa-miR-302d-5p	SLC1A3
hsa-miR-302d-5p	GATA6
hsa-miR-302d-5p	MAFG
hsa-miR-302d-5p	CHMP1B
hsa-miR-302d-5p	OR2C3
hsa-miR-302d-5p	HIST1H2BF
hsa-miR-302d-5p	ABRA
hsa-miR-302d-5p	C4orf46
hsa-miR-302d-5p	FAM210A
hsa-miR-302d-5p	RECQL
hsa-miR-302d-5p	KLHDC1
hsa-miR-302d-5p	AC132872.2
hsa-miR-302d-5p	RPL15
hsa-miR-302d-5p	TOB1
hsa-miR-302d-5p	PLAG1
hsa-miR-302d-5p	FAM110C
hsa-miR-302d-5p	NGLY1
hsa-miR-302d-5p	LRMP
hsa-miR-302d-5p	C8B
hsa-miR-302d-5p	SDF2L1
hsa-miR-302d-5p	TMEM30B
hsa-miR-302d-5p	DCAF4
hsa-miR-302d-5p	MTFR2
hsa-miR-302d-5p	MBTD1
hsa-miR-302d-5p	LCLAT1
hsa-miR-302d-5p	MTRNR2L13
hsa-miR-302d-5p	CHAMP1
hsa-miR-302d-5p	ZNF677
hsa-miR-302d-5p	BARD1
hsa-miR-302d-5p	HOXA5
hsa-miR-302d-5p	RP11-116D17.1
hsa-miR-302d-5p	EMCN
hsa-miR-302d-5p	ZNF254
hsa-miR-302d-5p	TFRC
hsa-miR-302d-5p	TAF13
hsa-miR-302d-5p	RSRC1
